# Supplementary material for: Active triggering control of pneumatic rehabilitation gloves based on surface electromyography sensors
Source: PeerJ Comput Sci. 2021 Apr 19;7:e448. doi: 10.7717/peerj-cs.448 (PMC8064233; doi:10.7717/peerj-cs.448)
Supplement: Supplemental Information 1 [file peerj-cs-07-448-s001.xlsx]

## Sheet: Sheet1
39.561	40.7384
39.6024	40.6373
39.516	40.3516
39.5784	40.0598
39.6572	39.9106
39.6557	40.2698
39.6008	40.4483
39.4878	40.3687
39.5011	40.2487
39.4988	39.974
39.4163	39.772
39.4281	40.02
39.4514	40.3744
39.3902	40.3609
39.2989	39.8929
39.0617	39.5164
39.1192	39.4041
39.1268	39.1761
39.1465	39.0131
39.2973	38.9041
39.3558	38.7729
39.3374	39.1203
39.2684	39.1277
39.2243	38.919
39.4158	39.2286
39.4411	39.2851
39.422	39.4263
39.4731	39.5976
39.5426	39.9955
39.4394	40.1794
39.3265	39.7417
39.2324	39.0009
39.342	38.8536
39.3393	38.4354
39.3505	38.5032
39.427	38.7075
39.4773	38.8778
39.5999	38.751
39.6482	38.6319
39.7288	38.761
39.7692	38.5866
39.7356	38.5889
39.8688	38.9133
39.9529	39.4118
40.0633	39.5856
40.1419	39.5557
40.0731	39.3966
40.2575	39.6803
40.2768	39.769
40.1452	39.628
40.143	39.5105
40.0606	39.3992
39.871	39.7093
39.713	39.9946
39.447	40.1518
39.5074	40.2962
39.3429	40.1077
39.3132	39.8834
39.3556	39.8442
39.3641	39.8922
39.3175	39.8247
39.3055	39.5938
39.2686	39.3208
39.3588	39.3217
39.219	39.0672
39.1965	39.3656
39.1778	39.6679
39.1757	39.8392
39.1336	39.794
38.9776	39.81
38.9954	39.7562
39.0102	39.483
38.9419	39.1882
39.0731	39.1575
39.1824	38.9975
39.1795	38.6359
39.2039	38.2943
39.0765	37.6469
39.1852	37.6179
39.2221	37.419
39.3066	37.2936
39.4576	37.4846
39.5834	37.5498
39.6479	37.9533
39.648	38.1552
39.4332	37.9608
39.5093	37.7586
39.4116	37.496
39.3705	37.5727
39.3899	37.7037
39.4464	37.9069
39.4935	37.7808
39.4656	37.622
39.2946	37.3956
39.2864	37.4353
39.2393	37.4684
39.294	37.3885
39.2859	37.1876
39.306	37.0202
39.1616	36.6523
39.0816	36.1444
39.0014	35.9896
39.0152	35.9682
38.9864	35.7891
39.0699	35.9219
39.1394	36.0058
39.3317	36.1025
39.5054	36.0891
39.4755	35.9839
39.7058	36.2857
39.8305	36.5775
39.8942	36.7804
40.0547	37.1912
40.1481	37.6276
40.2126	38.045
40.132	38.0973
39.9708	38.3021
39.9976	38.5668
39.8588	38.4113
39.6894	38.3488
39.6692	38.3505
39.6926	38.822
39.6315	38.9732
39.5671	39.0991
39.4598	39.1369
39.5181	39.2759
39.4861	39.2171
39.4997	39.1009
39.417	39.0176
39.375	39.0958
39.2056	38.8119
38.9705	38.3737
38.9089	38.1027
38.8575	37.5947
38.7744	37.5609
38.8932	37.5596
39.0191	38.0018
39.0031	38.0344
38.9495	39.9286
38.6899	42.8904
38.7153	45.6407
38.844	49.5308
39.0049	59.3673
39.5553	70.1565
40.0141	78.7311
41.2962	92.149
42.2035	101.477
42.5432	111.238
42.9338	123.429
42.6548	134.675
42.3552	139.199
42.0787	138.523
41.7676	139.41
41.3338	135.744
40.932	129.882
40.7315	122.23
40.5376	113.705
40.3894	104.585
40.1853	96.4487
40.2032	89.9905
40.1108	84.555
39.9531	80.5895
39.8352	77.0028
39.6831	73.7856
39.4624	72.4074
39.3994	70.4262
39.3603	68.5066
39.5292	67.1755
39.6028	66.1872
39.6238	66.1157
39.7219	65.492
39.844	63.9515
39.7711	61.7276
39.6432	59.3774
39.4291	57.1503
39.4657	55.3078
39.4424	54.0275
39.5573	52.4234
39.5993	50.3614
39.6075	48.4147
39.6412	46.6045
39.5484	45.2168
39.6053	44.0738
39.5991	43.2825
39.473	42.1261
83.6231	84.6253
120.375	120.014
151.028	149.505
176.491	174.094
197.711	194.585
215.394	211.675
230.13	225.916
242.41	237.783
252.643	247.673
261.171	255.941
268.277	262.616
274.199	268.125
279.134	272.716
283.26	276.542
286.699	279.73
289.564	282.373
291.952	284.576
293.941	286.412
295.586	287.941
296.97	289.216
294.524	290.278
285.971	291.164
273.096	291.901
257.088	292.516
239.571	293.015
221.535	293.431
203.899	293.777
186.879	294.079
170.695	294.331
155.287	294.541
141.131	294.716
128.059	294.861
116.44	294.983
106.166	295.084
97.1483	295.168
89.0692	295.238
81.8935	295.297
75.6853	295.346
70.1896	295.386
65.4083	295.42
61.4776	295.449
58.108	295.472
55.0851	295.492
52.472	295.521
50.187	295.546
48.5246	295.567
47.0721	295.584
45.8751	295.599
44.8507	295.611
43.9568	295.62
43.0641	295.629
42.2128	295.636
41.7451	295.655
41.3956	295.644
40.997	295.635
40.7991	295.627
40.567	295.621
40.2796	295.616
39.9863	295.612
39.6614	293.405
39.6726	289.028
39.5746	283.044
39.5734	275.505
39.6262	267.758
39.6433	259.436
39.5502	250.352
39.3516	241.197
39.3339	231.297
39.2655	221.101
39.1412	211.381
39.2795	201.777
39.3275	192.955
39.287	184.34
39.1457	176.114
38.9609	168.453
39.1158	160.698
39.0971	153.162
39.0412	146.129
39.0752	140.121
39.1573	135.585
39.172	130.985
39.0902	126.44
39.1698	121.994
39.169	117.47
39.0877	113.028
39.0871	109.435
39.0732	105.714
39.0482	102.05
38.9736	98.2445
38.6966	94.0389
38.7075	90.279
38.6897	86.3803
38.7151	82.997
38.7498	80.3791
38.7518	78.2915
38.7132	76.31
38.587	74.0545
38.5624	71.8122
38.6628	69.675
38.6391	67.4776
38.6058	65.4853
38.605	63.7042
38.6311	62.2468
38.532	60.6562
38.3689	59.1427
38.3672	57.6934
38.3927	56.4185
38.4542	55.5575
38.6533	54.9341
38.7654	54.3742
38.7514	53.6525
38.7397	53.1317
38.6628	52.2813
38.7868	51.3443
38.7961	50.3889
38.6426	49.4181
38.6088	48.9449
38.7015	48.7923
38.6175	48.3293
38.5207	47.8764
38.44	47.19
38.4668	46.2017
38.4757	45.4721
38.4965	45.1999
38.5408	44.8387
38.6179	44.6721
38.5882	44.7481
38.4963	44.7577
38.4868	44.6449
38.573	44.5508
38.5373	44.6068
38.5882	44.7743
38.6708	44.8064
38.6592	44.9272
38.5957	44.8801
38.3145	44.3842
38.3353	44.0784
38.3258	43.3938
38.3179	42.7696
38.3919	42.6657
38.5073	42.7538
38.5229	42.6123
38.5493	42.5749
38.4101	42.3155
38.4956	42.153
38.4057	41.9773
38.3979	41.8578
38.3511	42.094
38.2853	42.1967
38.1364	42.2824
38.0392	42.2329
37.9985	42.1782
38.1929	42.1729
38.2205	42.1014
38.3645	42.0686
38.4576	41.9473
38.4412	41.873
38.414	41.8246
38.3646	41.5962
38.4308	41.6073
38.4994	41.4823
38.4626	41.2975
38.593	41.3181
38.6749	41.3085
38.6357	41.2601
38.5761	41.2467
38.4459	40.8997
38.5926	41.1075
38.6208	41.1464
38.6578	41.1922
38.6751	41.4587
38.6627	41.5733
38.5987	41.6823
38.5587	41.6522
38.3508	41.2376
38.4059	40.8922
38.3041	40.4565
38.3266	40.1204
38.4395	40.2432
38.5201	40.2515
38.4261	40.3121
38.3477	40.2015
38.4033	40.1765
38.5974	40.1556
38.6248	39.9099
38.7551	39.9335
38.9174	40.2351
39.0661	40.6746
39.2034	40.7722
39.197	40.7729
39.3125	40.5989
39.261	40.1316
39.1913	39.8899
39.3212	39.9302
39.3354	40.0041
39.3607	39.9582
39.3818	39.9066
39.2382	39.7158
39.1991	39.6508
39.0725	39.543
38.967	39.48
38.9597	39.4409
38.9267	39.4754
38.8052	39.3431
38.7174	39.3268
38.5771	39.1386
38.6616	39.1833
38.6649	39.1399
38.7214	38.9963
38.7818	38.9573
38.7517	39.059
38.6728	39.0632
38.6205	38.6369
38.5903	38.2548
38.6592	38.0439
38.6226	37.8546
38.6458	37.6701
38.7323	37.5297
38.7507	37.5202
38.6988	37.2436
38.5616	36.8251
38.6084	36.6107
38.6743	36.4051
38.6083	36.5024
38.7011	36.9059
38.8187	37.2152
38.9435	37.3655
38.9804	37.3296
38.9171	36.8699
39.0121	36.6346
38.9301	36.3042
38.7946	36.3646
38.8026	36.5089
38.863	36.3472
38.8327	36.2124
38.7538	35.8986
38.6208	35.5834
38.7518	35.5759
38.7938	35.8114
38.8422	35.8331
38.8557	35.9452
38.7863	35.9042
38.7017	35.8701
38.5371	35.7343
38.5208	35.9434
38.6147	36.0774
38.6393	36.1084
38.6731	36.2283
38.4999	36.5297
38.3421	36.566
38.2509	36.6499
38.0674	36.8139
38.3175	36.9908
38.4722	37.0039
38.4667	36.8
38.5562	37.0061
38.6979	37.3927
38.7892	37.5135
38.7578	37.3992
38.5839	37.0219
38.627	37.0567
38.5823	37.2066
38.6525	37.1838
38.7916	37.3259
38.7867	37.4981
38.7288	37.5341
38.6135	37.5373
38.477	37.2982
38.5245	37.1929
38.4969	37.0784
38.5679	37.1038
38.5868	37.1115
38.71	37.1045
38.7993	37.1793
38.8736	37.1476
39.0162	37.2823
39.2156	37.502
39.1937	37.5777
39.2426	37.8825
39.2968	38.1903
39.2882	38.4736
39.2677	38.5351
39.0894	38.3848
39.0482	38.4074
39.3766	38.4396
39.5293	38.8425
39.6835	39.138
40.5506	39.2768
42.6164	39.379
43.5857	39.3836
43.8293	38.8368
43.804	38.5691
43.4875	38.3863
43.0357	38.2878
42.7263	38.2593
42.4014	38.2491
42.1306	38.2405
41.8512	37.9514
41.5378	37.6432
41.4243	37.6282
41.2223	37.4545
41.1615	37.4441
41.1779	37.5697
41.0439	37.5401
40.865	37.5288
40.6219	37.3851
40.4731	37.1982
40.4431	37.6334
40.2032	37.5663
40.0301	37.6179
39.9531	37.6205
39.7411	37.3406
39.5645	37.0134
39.3367	36.687
39.4155	36.9522
39.3603	36.9584
39.3411	36.8695
39.4864	37.2923
39.6074	38.0342
39.6814	38.4644
39.6624	38.3259
39.5123	38.1031
39.6156	37.9846
39.5942	37.6306
39.6032	37.0939
39.557	36.7541
39.5722	36.6455
39.4909	36.6087
39.3694	36.1483
39.1876	35.8318
39.1569	35.7829
38.9971	35.5541
39.119	36.223
39.261	37.1431
39.3793	37.8293
39.8808	38.2399
40.1375	38.2598
40.2977	38.1957
40.3641	38.1558
40.2851	38.2299
40.2059	38.2111
40.1264	38.1015
40.087	37.8758
40.0945	37.5937
40.329	37.1705
40.7528	37.0463
40.8777	36.9427
40.8339	37.0042
40.7707	37.5389
40.4896	37.8636
40.3091	38.0402
40.2258	38.2545
40.0893	38.3659
40.1635	38.7677
40.1717	38.807
40.071	39.0278
40.0409	39.561
40.0963	40.0188
40.062	40.1585
39.9527	40.1407
39.808	40.0317
39.7948	40.1693
39.6495	40.1899
39.5687	40.0728
39.582	40.2975
39.6871	40.4983
39.7209	40.4641
39.682	40.261
39.757	40.2126
39.7791	40.038
39.7573	39.8924
39.8063	40.3218
39.7934	40.8408
39.7558	41.3002
39.711	41.5084
39.5797	41.6685
39.5912	41.775
39.5604	41.8638
39.6153	41.8303
39.688	41.789
39.7351	41.8889
39.7072	41.8378
39.7108	41.4863
39.6467	41.1934
39.7544	41.0165
39.683	40.8825
39.6235	40.7171
39.6948	40.7404
39.7677	40.9479
39.7343	40.9597
39.6126	40.768
39.5917	40.8231
39.628	40.6005
39.6045	40.2537
39.7058	40.1394
39.8709	40.1919
40.0755	40.2893
40.0715	40.1153
39.9204	39.7017
39.9691	39.7331
39.9693	39.4772
39.795	39.0357
39.7034	38.7886
39.6136	38.5558
39.4582	38.4156
39.3019	38.3524
39.0641	38.246
39.0406	38.3723
38.8867	38.1955
38.7988	38.3436
38.7926	38.6282
38.7338	38.6236
38.6982	38.7676
38.5879	38.7935
38.4557	38.6405
38.4262	38.4727
38.415	38.2926
38.5131	38.1693
38.6889	38.2144
38.8354	37.9967
38.9171	37.8422
38.9181	37.5657
39.013	37.5233
39.0651	37.3268
39.0549	37.1093
39.1807	37.3042
39.2317	37.48
39.1803	37.3847
39.0837	37.3188
38.8823	37.1564
38.8354	37.0613
38.7291	36.8612
38.5197	36.5467
38.3989	36.3921
38.3922	36.3707
38.333	36.1917
38.3373	36.0157
38.1663	35.6541
38.2521	35.6751
38.1625	35.5583
38.1281	35.4744
38.1666	35.4179
38.333	35.4515
38.4716	35.56
38.5603	35.6504
38.6476	35.7392
38.7875	35.9206
38.837	35.9241
38.9722	36.3299
39.0983	36.6547
39.2034	36.9253
39.2373	37.0433
39.1312	37.0612
39.0562	36.9685
38.9669	36.7033
38.8118	36.3883
38.8169	36.5824
38.8078	36.8114
38.8001	36.841
38.8072	36.7851
38.7056	36.7385
38.8225	36.8474
38.7855	36.7232
38.6204	36.5661
38.6305	36.7172
38.6793	36.8833
38.5991	36.8069
38.4785	36.6895
38.378	36.726
38.4957	36.837
38.3923	36.7146
38.4539	36.8544
38.6798	37.0111
39.0159	37.182
39.2287	37.1633
39.339	37.1477
39.5383	37.1615
39.6775	37.0522
39.7264	36.9208
39.7268	36.8919
39.7271	37.1364
39.7006	37.2461
39.665	37.1227
39.5011	37.0064
39.5793	37.1915
39.5103	37.2652
39.4527	37.3669
39.3913	37.6531
39.4207	38.0797
39.3378	38.2471
39.2552	38.1315
39.1327	37.8873
39.1381	37.8048
39.0351	37.5076
39.1104	37.2197
39.1598	36.8052
39.2278	36.6075
39.1904	36.6577
39.025	36.9144
39.008	37.0208
39.2087	38.5735
39.4835	42.0567
40.4243	48.8409
45.8017	57.4626
50.5246	70.3959
53.0635	88.4935
55.7703	100.351
56.75	109.024
56.4919	113.7
55.3769	114.816
53.9509	115.799
52.8699	116.74
51.5931	113.924
50.3276	109.375
49.0446	103.073
47.7069	95.6584
46.431	88.2574
45.2468	81.6065
44.1257	75.4327
43.2586	70.6103
42.3345	65.8395
41.672	62.1324
41.1735	58.9895
40.8253	56.3972
40.5217	54.1698
40.1612	52.2734
39.9817	50.6796
39.8187	49.1231
39.5486	47.6649
39.5249	46.7586
83.6395	88.2304
120.335	122.777
150.914	151.579
176.396	175.594
197.632	195.62
215.328	212.309
230.075	226.216
242.378	237.805
252.63	247.476
261.16	255.589
268.281	262.095
274.216	267.489
279.162	271.985
274.096	275.717
260.608	278.828
244.64	281.42
229.184	283.58
215.417	285.38
203.905	286.88
194.836	288.131
188.057	289.172
183.24	290.04
180.193	290.764
178.124	291.367
176.28	291.869
174.594	292.288
172.975	292.637
171.559	292.927
170.204	293.17
169.236	293.371
168.066	293.54
166.528	293.68
164.467	293.797
161.728	293.894
158.708	293.975
155.304	294.043
152.024	294.099
148.472	294.146
144.491	294.185
139.75	294.231
134.63	294.27
129.478	294.302
124.257	294.328
119.571	294.364
114.913	294.38
110.28	294.394
105.774	294.418
101.012	294.439
96.4527	294.456
92.022	294.471
87.9939	294.496
84.3685	294.504
80.8505	294.51
77.3278	294.515
73.8549	294.533
70.464	294.548
67.4904	294.574
64.6498	293.951
62.3498	290.557
60.1377	285.258
58.0525	278.72
55.979	271.378
53.9959	263.379
52.1151	254.524
50.3328	244.929
48.8878	234.73
47.7374	224.579
46.7518	214.266
45.9306	205.001
45.1387	196.178
44.3042	187.456
43.5148	178.684
42.7227	170.379
42.358	162.062
41.9198	153.425
41.5681	145.879
41.3019	139.134
40.9994	132.613
40.7474	126.117
40.3225	119.845
40.1967	113.785
40.0247	108.037
39.8814	102.589
39.8426	98.3712
39.743	94.4265
39.4318	90.6693
39.2127	87.0815
38.9629	83.6888
39.0503	80.3109
39.0963	77.1736
39.0002	74.4249
38.974	71.7045
38.9386	69.2629
38.8689	67.8595
38.8376	65.8573
38.7444	63.7455
38.8413	61.9723
38.7072	60.0917
38.6626	58.4842
38.6523	57.1447
38.6571	55.8806
38.594	55.0287
38.3937	53.7547
38.455	52.4647
38.533	51.2688
38.6652	50.1917
38.9365	49.5224
39.1223	49.0049
39.2503	48.8826
39.3301	48.7404
39.2488	48.2458
39.2751	47.659
39.2433	47.1164
39.2839	46.5835
39.4118	46.1261
39.3438	45.436
39.2602	44.7131
39.0832	43.7615
39.0162	42.9686
39.1619	42.3883
39.2429	41.9182
39.3374	41.8085
39.4161	41.7306
39.3205	41.3164
39.1736	40.81
38.9439	40.2404
38.9941	39.9268
39.0226	39.9475
39.0328	39.8037
39.1489	39.8181
39.2321	39.8435
39.2343	39.3678
39.2093	39.025
38.9601	38.6857
38.9943	38.8327
38.9287	38.5523
38.9546	38.0768
39.0971	38.1507
39.189	38.1586
39.2118	37.9771
39.1503	37.8124
39.0049	37.7289
39.0987	38.4383
39.1366	38.6265
39.2756	38.864
39.4721	39.6797
39.6358	39.9162
39.6916	39.8044
39.7247	39.4829
39.8463	39.4568
39.9073	39.0321
39.797	38.3961
39.9334	37.9601
40.0739	37.6236
40.1776	37.585
40.1297	37.5528
39.942	36.9619
40.0139	37.0067
39.9396	36.6949
39.8507	36.4618
39.911	36.5497
39.9075	36.5692
39.73	36.5183
39.5955	36.3281
39.3894	36.1428
39.4729	36.257
39.4216	36.4864
39.4459	36.3821
39.4662	36.4699
39.4294	36.2743
39.345	36.0845
39.1001	35.5637
39.0169	35.4789
38.9878	35.6097
39.0442	35.5844
39.1852	35.6439
39.2489	35.7069
39.3692	35.6386
39.3889	35.1384
39.3247	34.5738
39.5264	34.5734
39.5467	34.7074
39.5368	35.2488
39.73	35.9149
39.797	36.4028
39.8259	36.4334
39.7963	36.2574
39.6508	36.1241
39.7175	36.2145
39.6657	36.2093
39.6628	36.2318
39.8216	36.076
40.021	35.9595
40.0261	35.9431
39.896	35.6607
39.8144	35.4255
39.8807	35.3906
40.0166	35.254
40.1701	35.6238
40.3249	35.9991
40.4405	35.976
40.4562	36.0508
40.3887	35.952
40.5205	35.91
40.6438	36.439
40.639	36.5978
40.8366	36.8779
40.9743	37.0845
41.0219	37.2969
40.9407	37.4336
40.6582	37.6281
40.6242	37.7634
40.4481	37.6343
40.2611	37.2178
40.1858	37.2872
40.1231	37.3852
40.0574	37.2655
39.9758	37.3
39.8541	37.1541
39.8869	37.1535
39.9009	37.0589
39.9931	37.3427
39.976	37.8882
39.9751	38.5442
39.8938	39.0505
39.732	39.4457
39.718	39.8689
39.7199	39.9934
39.7079	39.8015
39.8055	39.7357
39.7793	39.6003
39.7306	39.4068
39.6497	39.3531
39.448	39.3351
39.5083	38.8769
39.4645	38.4817
39.4414	38.1255
39.5296	37.9629
39.5628	37.8678
39.4696	37.5467
39.3785	37.306
39.1415	36.7831
39.1991	36.5891
39.0591	36.3334
39.023	36.2681
39.0466	36.3748
38.9992	36.4637
39.0268	36.3498
38.9289	36.2146
38.9951	36.2362
39.0771	36.1199
39.0783	36.3319
39.321	36.6832
39.6039	36.8013
39.8128	36.9669
39.9466	37.0512
39.8163	36.9602
39.9092	37.2874
39.8791	37.3317
39.7601	37.0597
39.7818	37.2225
39.8535	37.3716
39.779	37.5093
39.8378	37.3689
39.8869	37.131
40.1292	37.1207
40.2236	36.8973
40.3426	36.7917
40.4553	36.7037
40.5357	36.805
40.4415	36.9028
40.2959	36.9306
40.0939	36.9403
40.0734	37.0693
39.8817	36.9888
39.7488	36.8948
39.6515	37.1657
39.5838	37.4317
39.5274	37.6669
39.3998	38.2523
39.4412	38.6059
39.422	38.5244
39.3523	38.376
39.4688	38.6418
39.539	38.8229
39.5438	39.0277
39.3463	38.8222
39.0878	38.8659
39.02	39.4798
38.8964	39.7497
38.8874	39.9611
38.974	40.4462
38.9923	40.8102
38.9942	40.7509
38.9958	40.4328
38.8897	39.832
38.9355	39.573
38.7857	39.0215
38.822	39.0588
38.8926	39.0899
38.9514	39.3173
38.9333	39.5068
38.8375	39.2483
38.9592	39.4762
39.0069	39.7063
39.0198	39.831
39.044	39.9214
39.1044	40.3863
39.1548	41.1497
39.1833	41.7188
39.0594	41.9378
39.2381	41.9995
39.3199	41.8897
39.3881	41.543
39.4718	40.8646
39.5549	40.447
39.5436	40.1124
39.5208	39.6859
39.4346	39.4916
39.5239	39.4103
39.5044	39.141
39.5418	39.0778
39.5596	38.8237
39.4669	38.3568
39.336	37.8602
39.1329	37.5135
39.071	37.453
39.0329	37.5368
38.9072	37.2709
39.0576	37.3985
39.062	37.3437
39.0657	37.0966
39.0285	37.0249
38.8229	36.9249
38.8799	36.949
38.8602	36.7677
38.8976	36.7777
39.0227	37.1487
39.1001	37.3638
39.0169	37.3685
39.0147	37.0904
38.9457	36.7243
39.0762	36.5938
39.1044	36.4313
39.2085	36.4706
39.3758	36.7584
39.5153	36.9849
39.4837	36.9319
39.3903	36.8608
39.5273	37.2851
39.6818	37.4372
39.6359	37.3088
39.6649	37.4167
39.7293	37.5603
39.7695	37.8949
39.7225	37.9454
39.7235	37.6785
39.9259	37.6308
39.9871	37.6447
40.0381	37.7772
40.1612	37.9144
40.1966	37.9348
40.1455	37.7503
40.0895	37.6368
39.9085	37.5289
39.9592	37.909
39.8805	37.8631
39.8955	37.892
39.9618	38.1042
40.0573	38.2272
40.1503	38.1686
40.1338	37.8914
40.2006	37.6604
40.216	37.6694
40.2154	38.0261
40.4701	38.1756
40.6152	38.0987
40.7227	37.9003
40.8526	37.829
40.8936	37.6487
41.0756	37.7402
41.1466	37.7091
41.1924	37.5219
41.4186	37.5943
41.6339	37.6814
41.6253	37.6332
41.551	37.7676
41.4219	37.9064
41.3815	38.1565
41.2135	38.1499
41.1676	38.2116
41.2636	38.4779
41.3704	38.861
41.3252	39.0191
41.1532	39.0837
41.0635	38.8555
41.056	38.8264
40.9691	38.6948
41.0176	38.5045
40.964	38.2385
40.9731	38.0168
40.9269	38.4902
40.7004	38.5086
40.6593	38.618
40.5043	38.4674
40.4288	38.7314
40.5539	39.1528
40.591	39.3563
40.5279	39.4587
40.4216	39.168
40.2121	38.7645
40.1988	38.576
40.0936	38.3115
40.0194	37.7956
39.9576	37.3657
39.7986	36.9537
39.6661	36.6373
39.3945	36.4676
39.3965	36.4604
39.4251	36.4814
39.3951	36.2034
39.5045	36.3746
39.5688	36.7188
39.6357	36.9787
39.5976	36.8595
39.4448	36.8274
39.5593	36.7469
39.5339	36.935
39.4724	36.8903
39.4346	37.0142
39.4165	37.3189
39.4282	37.6265
39.3172	37.5337
39.1575	37.5772
39.2124	37.8553
39.1776	37.7109
39.2292	37.6309
39.2857	37.5911
39.4267	37.5579
39.4502	37.3959
39.5504	37.355
40.2651	37.3074
40.6593	37.0394
40.7728	36.7624
40.854	37.0822
40.8814	37.3622
40.7968	37.4209
40.6725	37.416
40.4078	37.506
40.3753	37.7154
40.281	37.7152
40.2696	38.7224
40.4481	39.8437
40.5834	40.9125
40.6693	41.4002
40.6469	41.3634
40.5611	41.4537
40.6641	41.4214
40.6023	41.3542
40.6716	41.9429
40.7563	42.0574
40.9477	45.0002
41.3355	53.4562
43.5659	63.2026
45.3574	69.8605
46.1654	77.7323
46.476	82.6805
46.8827	85.0982
46.738	84.373
46.4563	83.2987
46.02	84.7538
45.455	86.8662
44.9708	86.3031
44.5001	87.9961
44.0675	86.0493
43.7608	82.8018
43.5455	78.8464
43.3257	74.7713
43.0083	70.7709
42.5826	67.0881
42.2413	64.61
41.9032	61.7526
41.5811	58.8475
41.2858	56.4535
41.1204	55.1569
40.9019	56.1583
84.7736	96.1038
121.333	129.378
151.813	157.107
177.159	180.228
198.281	199.509
215.869	215.576
230.526	228.979
242.74	240.148
252.918	249.455
261.4	257.211
268.482	263.567
274.37	268.757
279.276	273.054
283.365	276.622
286.773	279.595
289.612	282.073
291.978	284.124
293.964	285.834
295.605	287.258
296.986	288.445
298.136	289.435
299.095	290.246
299.894	290.921
300.345	291.485
297.337	291.967
291.257	292.356
282.712	292.68
272.233	292.95
260.519	293.189
248.474	293.387
236.261	293.54
223.84	293.666
211.394	293.772
198.86	293.874
186.548	293.958
174.663	294.015
163.832	294.063
153.719	294.116
144.31	294.146
135.476	294.186
127.187	294.218
119.366	294.245
111.99	294.268
105.399	294.287
99.5043	294.302
94.162	294.316
88.9445	294.34
84.2474	294.36
80.0377	294.377
76.1132	294.391
72.6548	294.403
69.6519	294.413
66.8808	294.434
64.1553	294.452
61.6557	294.454
59.492	294.482
57.501	294.492
55.6806	294.5
54.3114	294.494
53.1032	294.488
52.0024	294.497
50.9641	294.505
49.8706	294.242
48.9727	291.163
47.9559	286.622
47.1086	280.421
46.4562	273.964
45.9125	265.561
45.3788	256.356
44.7864	246.992
44.4136	236.369
43.7805	225.743
43.2396	215.411
42.95	206.277
42.6414	197.309
42.3844	188.439
42.0895	180.067
41.8304	171.68
41.6682	163.414
41.3584	156.446
41.154	150.747
40.9971	145.769
40.8797	139.686
40.6611	133.221
40.3042	127.806
40.2621	122.609
40.0658	118.076
39.9291	113.292
40.0032	108.727
39.9574	104.427
39.9059	100.319
39.7958	96.8153
39.825	93.224
39.7418	89.3045
39.686	85.5278
39.6797	82.797
39.7013	80.0244
39.7328	77.9287
39.6919	75.8869
39.5234	73.5004
39.598	71.3639
39.5258	69.1268
39.4119	66.8865
39.4647	65.4359
39.3745	64.1331
39.2724	62.4968
39.0664	60.7974
38.8679	59.4349
38.8503	58.3398
38.8758	57.575
38.9106	56.7093
38.9261	56.3909
38.9659	55.7494
38.9184	55.685
38.7178	54.9731
38.7251	53.9636
38.7581	52.8805
38.799	51.9377
38.9137	52.0653
38.9824	51.7284
39.0666	51.5282
39.0292	51.1197
38.9175	51.3836
39.0527	50.9857
39.0446	50.3587
39.1452	50.3062
39.3096	50.0611
39.3795	50.0313
39.4109	50.1812
39.4102	50.0777
39.2887	50.1661
39.3352	50.1592
39.2262	49.4819
39.2294	49.0383
39.259	48.7761
39.2701	48.4502
39.266	48.2592
39.1148	47.3613
39.0695	46.5862
39.0048	45.8462
39.0046	45.1624
39.0313	44.7538
38.9998	44.4536
38.8796	45.2241
38.6719	45.1679
38.378	45.0269
38.3345	44.6409
38.2177	44.4938
38.2144	44.8278
38.3057	44.9451
38.3011	44.895
38.1362	44.6249
37.9718	44.0238
37.8886	43.2677
37.9939	42.5436
38.0682	41.6716
38.1435	41.1463
38.2734	40.8564
38.3414	40.6819
38.3443	40.4828
38.2393	40.384
38.3264	40.5837
38.3318	40.3875
38.3632	40.3046
38.4297	40.3564
38.3776	40.6682
38.267	40.4042
38.1749	40.0768
38.0444	39.8845
38.2043	40.1675
38.2301	39.9601
38.265	40.3916
38.2807	40.4961
38.3877	40.6637
38.4367	40.7631
38.37	40.9534
38.2876	41.1657
38.3935	41.8261
38.3743	42.6585
38.4255	42.8015
38.4278	42.4237
38.4163	42.3372
38.3934	42.1443
38.2265	42.4401
38.262	42.4046
38.2513	42.0258
38.3095	41.7908
38.3849	41.6217
38.394	41.5346
38.3748	41.6097
38.3318	41.9141
38.2155	42.3423
38.414	42.5111
38.4988	42.3026
38.5964	42.0214
38.7314	41.4647
38.6962	40.9203
38.5997	40.6814
38.4656	39.9451
38.421	39.9763
38.4778	40.029
38.4311	39.7373
38.5265	40.1254
38.5926	40.4085
38.6074	40.8594
38.566	41.5171
38.3569	41.5683
38.4647	41.7049
38.4739	41.1339
38.4951	40.6311
38.553	40.2927
38.5609	39.8764
38.5676	39.5026
38.5462	39.1777
38.4344	38.7055
38.5159	38.9701
38.4897	38.5996
38.4814	38.6535
38.5281	39.0611
38.5939	39.7231
38.5951	39.724
38.408	39.5905
38.2386	39.2778
38.2318	38.8695
38.1993	38.2606
38.2528	37.7398
38.257	37.3729
38.2337	37.2417
38.2143	37.2399
38.1041	37.1847
38.1735	37.1655
38.2312	37.1764
38.266	37.3735
38.362	37.5377
38.3884	37.5671
38.3029	37.9677
38.2451	37.8315
38.1029	37.7448
38.1456	37.6726
38.114	37.8407
38.1683	38.236
38.2135	37.9879
38.2914	37.7542
38.2355	37.6536
38.1621	37.6368
38.1278	37.5691
38.1797	37.2978
38.1156	37.1792
38.2233	36.8923
38.4205	36.6533
38.5446	36.1854
38.5942	35.8493
38.6087	35.596
38.8357	36.3923
38.8906	36.8678
38.9094	36.982
39.0594	37.3055
39.1845	37.9109
39.2081	38.1467
39.2008	38.1955
39.1143	37.9542
39.2167	38.1425
39.1409	37.6279
39.1315	37.3065
39.231	37.1596
39.314	36.8894
39.4235	36.7314
39.4207	36.4654
39.5123	36.499
39.6156	36.9298
39.7016	37.3023
39.8942	37.6933
39.9607	37.8983
39.8415	37.6527
39.6884	37.5824
39.4265	37.685
39.3964	38.1197
39.2235	38.1461
39.1465	38.0876
39.3242	38.2403
39.4722	38.3943
39.4479	38.2676
39.4678	38.2425
39.4308	38.2082
39.5745	38.3408
39.5734	38.2632
39.5724	37.9837
39.6388	37.8851
39.721	38.1118
39.7626	38.2336
39.7301	38.2679
39.6225	38.2428
39.5865	38.289
39.4491	38.247
39.3883	38.2925
39.351	38.2364
39.3737	38.2031
39.3658	38.3097
39.292	38.0761
39.3648	38.0427
39.3449	37.8536
39.3149	37.8304
39.4376	38.1603
39.4862	38.8112
39.4729	39.3268
39.3813	39.6087
39.1975	39.6959
39.2457	39.8089
39.2323	39.9567
39.2613	40.1337
39.393	40.5766
39.4893	41.1874
39.4621	41.6831
39.3051	41.7334
39.1608	41.8292
39.1481	41.8015
39.0837	41.5635
39.1107	41.4055
39.1868	41.2469
39.2369	41.0074
39.2652	41.1704
39.1813	40.9436
39.2323	40.8351
39.221	40.6911
39.2251	40.4904
39.2419	40.6187
39.3231	40.8196
39.3101	40.9064
39.2188	41.0325
39.0083	40.681
39.0075	40.576
38.9666	40.2602
38.9593	39.9434
38.9802	39.7733
39.0378	39.9674
38.9112	39.9545
38.7655	39.8229
38.6306	39.4849
38.639	39.4718
38.6192	39.3267
38.643	39.2728
38.5822	39.0399
38.6525	38.6981
38.711	38.279
38.5449	37.7819
38.5676	37.7706
38.5731	37.7612
38.5374	37.8206
38.6151	37.9372
38.6665	38.1418
38.6824	37.775
38.6956	37.3889
38.5724	36.9864
38.6174	36.7585
38.4803	36.3672
38.4869	36.3499
38.479	36.2684
38.3784	36.1199
38.2543	35.9693
38.0166	36.0318
37.9125	36.057
37.9332	36.1317
37.9235	36.1135
37.9961	36.0445
38.0297	36.1616
38.0443	36.3667
38.0833	36.5241
38.0084	36.5882
38.134	36.937
38.1312	36.8382
38.1154	36.5545
38.2097	36.3717
38.2212	36.1522
38.177	35.9559
38.1402	35.752
37.9214	35.4747
38.0347	35.4987
38.0619	35.5054
38.1651	35.484
38.3183	35.3185
38.3385	35.1403
38.3688	35.1395
38.3134	34.9642
38.2807	34.8585
38.3475	34.7435
38.3091	34.4999
38.4249	34.5521
38.5616	34.5688
38.6084	34.22
38.6474	33.9562
38.6397	33.6961
38.8212	33.936
38.8382	34.0151
38.8658	34.2287
39.0768	34.7022
39.1049	35.0161
39.0477	35.2509
38.8792	35.3526
38.6582	35.3836
38.7426	35.6511
38.7458	35.7264
38.7754	35.9234
38.9209	36.3025
39.0556	36.3094
39.0066	36.463
38.8987	36.5641
38.8356	36.6752
38.9173	36.9961
38.7974	36.9546
38.7781	37.0813
38.7619	37.3479
38.8559	37.4627
38.894	37.3435
38.8317	37.1367
38.9544	36.8434
39.0432	36.6931
39.1037	36.3529
39.302	36.4455
39.3597	36.6167
39.3406	37.5249
39.3248	37.7713
39.2444	37.7215
39.3789	37.8412
39.3969	37.7395
39.4657	37.8159
39.6304	37.6243
39.7946	38.096
39.9583	38.3681
40.0409	38.4741
39.9352	38.4952
39.9277	38.5262
39.814	38.5252
39.9207	38.296
39.8484	37.9304
39.8285	37.6795
39.7045	37.2421
39.4937	36.797
39.5194	36.5335
39.5006	36.3677
39.4312	35.9608
39.5211	35.9442
39.6498	36.0377
39.6764	36.1291
39.712	36.2053
39.7283	36.0673
39.9164	35.9791
39.9792	35.9997
40.0852	36.6213
40.281	37.0855
40.4308	37.2306
40.4884	37.2575
40.4424	37.1859
40.3638	37.2471
40.2311	37.3652
40.0803	37.3965
40.1157	37.4764
40.0378	37.5294
39.9998	37.8289
39.9815	38.0515
39.832	37.9416
39.9222	37.8097
39.8363	37.6461
39.7781	37.456
39.8774	37.5124
40.0004	37.5595
39.9283	37.3436
39.8548	36.9353
39.686	36.2458
39.7738	35.8727
39.6454	35.3469
39.4982	35.2983
39.456	35.3517
39.515	35.544
39.4029	35.5968
39.2558	35.4931
39.0929	35.3798
39.1854	35.3928
39.1686	35.3365
39.2351	35.4642
39.2906	35.772
39.3099	36.1629
39.2589	36.4483
39.0686	36.3638
39.004	36.7501
38.9503	37.0585
38.9457	37.2753
38.9822	37.6439
39.053	38.0317
39.0985	38.0594
39.0961	37.8944
38.9061	37.5421
38.9626	37.5036
38.8755	37.4313
38.8834	37.3038
38.984	37.1708
38.947	36.8316
38.8624	36.3743
38.7651	35.9932
38.778	35.8234
38.8962	36.0848
38.8604	36.2221
38.9648	36.4574
39.1459	36.4923
39.3237	36.2258
39.4852	36.2322
39.5259	36.0762
39.6537	36.0538
39.6931	36.035
39.6991	35.7374
39.7846	35.5162
39.9768	35.3856
40.1907	35.7468
40.3286	35.9539
40.2018	35.7772
40.3245	35.8986
40.2521	35.7714
40.2992	35.7326
40.4728	36.1166
40.6711	36.5172
40.7156	36.3809
40.672	35.9316
40.6491	35.7318
40.6972	35.7936
40.697	35.7242
40.8177	35.747
40.8915	35.5376
40.832	35.2154
40.7825	34.92
40.674	34.4993
40.6911	34.6859
40.5711	35.0295
40.3904	35.1949
40.3876	35.2656
40.4121	35.4722
40.446	35.4564
40.4742	35.4701
40.3903	35.4143
40.5218	35.6768
40.5106	35.7209
40.5415	35.677
40.5941	35.4928
40.6379	35.3661
40.6207	35.2336
40.5393	35.4188
40.4445	35.4521
40.4461	35.3456
40.4475	35.23
40.556	35.4292
40.7405	35.9981
41.0957	36.1229
41.3649	36.1061
41.5623	36.0518
41.8611	35.9931
42.043	35.7964
42.1946	35.2565
42.4955	35.1155
42.8671	34.9576
43.3246	35.6454
43.7057	36.1111
43.9563	36.2171
44.2322	36.4801
44.1129	36.5112
43.9866	36.5237
44.1635	36.5072
44.2705	36.292
44.4538	35.9381
44.5527	35.8043
44.5949	35.6794
44.7913	35.8977
44.9011	35.7572
45.1807	35.6805
45.6689	35.63
46.2101	35.9236
46.5133	35.7654
46.4705	35.7947
46.5019	36.3564
46.5953	38.7451
46.6463	40.9506
47.1454	43.4063
48.2195	48.233
49.1279	55.2369
50.4625	62.5375
54.2072	69.1988
62.0957	78.8867
66.1713	91.2175
73.8522	105.603
78.5606	118.33
79.9995	128.559
79.8287	135.311
77.9805	137.217
75.0839	135.609
71.5553	131.784
67.8626	125.87
64.1138	118.86
60.869	111.004
57.7754	102.617
55.09	94.4991
52.8925	86.9019
51.2358	80.3694
49.9224	74.3213
48.8144	68.8916
47.9986	64.1386
47.4665	60.339
47.023	56.7965
46.7744	53.5221
46.7686	51.1024
46.8579	49.1665
46.8919	47.6876
46.8397	46.1463
46.8231	45.2916
46.6346	44.5122
46.4239	43.8493
46.4362	43.6864
46.46	43.5506
46.3589	43.4241
46.2075	43.4126
45.9336	43.4031
45.5979	43.1936
88.6869	85.4477
124.594	120.673
154.531	150.027
179.437	174.489
200.18	194.874
217.451	211.875
231.844	226.042
243.838	237.848
253.834	247.687
262.163	255.886
269.117	262.758
274.913	268.284
279.729	272.862
283.756	276.676
287.098	279.842
289.897	282.48
292.216	284.679
294.161	286.51
294.95	288.037
291.336	289.309
284.685	290.369
275.502	291.253
264.385	291.989
251.776	292.603
237.844	293.114
223.346	293.54
209.008	293.895
195.072	294.191
181.861	294.438
169.212	294.643
157.181	294.814
145.705	294.97
134.865	295.087
124.744	295.184
115.867	295.265
107.999	295.333
100.704	295.402
94.06	295.461
87.9731	295.509
82.3365	295.549
77.3037	295.583
73.0559	295.611
69.3414	295.634
66.058	295.654
63.0129	295.683
60.2336	295.708
57.8907	295.729
55.8576	295.746
54.0962	295.747
52.5478	295.761
51.2038	295.773
49.9897	295.796
48.8303	295.815
47.8506	295.845
46.9537	295.856
46.0316	295.852
45.3706	295.634
44.8064	293.142
44.296	288.553
43.8303	282.446
43.3616	274.725
42.9039	265.255
42.3479	255.429
41.9517	245.831
41.6618	236.596
41.3531	227.531
41.0421	218.271
40.5681	209.184
40.4013	200.162
40.2758	190.346
40.1578	181.83
40.0326	173.834
39.7403	166.486
39.4026	159.704
39.1615	153.099
39.0546	146.641
39.1267	140.037
39.1331	133.715
39.1921	128.137
39.2413	123.207
39.2822	118.32
39.2895	113.616
39.121	109.131
39.2492	104.696
39.262	100.476
39.2861	96.5167
39.3196	93.5124
39.2535	90.7402
39.1447	87.9868
39.0138	85.0744
38.9718	82.164
39.004	79.5237
38.9636	76.934
38.9166	74.749
38.8774	72.7805
38.8447	71.0594
38.7906	69.5178
38.6381	67.8839
38.8467	66.1462
38.9401	64.6713
39.085	63.1064
39.2863	61.9098
39.3601	60.8589
39.3947	60.1309
39.3698	59.0138
39.2416	57.5054
39.3766	56.2887
39.4353	55.2076
39.4574	54.1053
39.4221	52.9717
39.2852	51.7719
39.1039	50.9064
38.9261	50.0508
38.8987	49.593
39.0505	49.0235
39.177	48.5086
39.269	48.4018
39.3591	48.7024
39.3804	48.9663
39.2773	48.931
39.0706	48.4046
39.2609	48.0466
39.3389	47.6677
39.377	47.4056
39.3417	47.2543
39.3793	47.3029
39.357	47.5717
39.2713	47.5137
39.0789	47.0624
39.1738	46.646
39.1723	46.1244
39.1711	45.8241
39.1566	45.6141
39.1177	45.6137
39.0718	45.5865
38.9664	45.7787
39.0264	46.315
39.1838	46.0903
39.2209	45.836
39.2653	46.0806
39.2754	45.9353
39.1898	45.8142
39.0916	45.673
38.9427	45.3942
39.0737	45.323
39.1829	45.2502
39.2605	45.0419
39.3923	45.298
39.3812	45.6592
39.2914	45.8528
39.2166	45.7723
39.0737	45.8664
39.25	45.73
39.3164	45.3476
39.4523	45.0424
39.4984	44.8553
39.416	44.5112
39.401	43.9694
39.3348	43.7462
39.4408	43.2915
39.5559	42.7649
39.5848	42.5275
39.6222	42.6655
39.6266	42.6462
39.5631	42.5092
39.4027	41.9921
39.1213	41.4268
39.1554	41.117
39.063	40.617
38.9993	40.375
39.0806	40.5225
39.1484	41.2767
39.0571	41.5694
39.0079	41.8536
38.9266	41.9159
39.0872	41.8469
39.1001	41.6148
39.1378	41.3542
39.1154	41.1102
39.0968	41.2157
39.0276	41.4112
[truncated: 1,301 more rows]
