# Supplementary material for: Active triggering control of pneumatic rehabilitation gloves based on surface electromyography sensors
Source: PeerJ Comput Sci. 2021 Apr 19;7:e448. doi: 10.7717/peerj-cs.448 (PMC8064233; doi:10.7717/peerj-cs.448)
Supplement: Supplemental Information 3 [file peerj-cs-07-448-s003.xlsx]

## Sheet: Sheet1
41.5036	46.5391
41.8257	46.6801
41.718	46.6766
41.8297	46.6469
42.0974	46.6355
42.1862	46.6395
42.0721	46.5756
41.9502	46.4687
41.8217	46.3527
41.5535	46.471
41.6927	46.5427
41.6877	46.4547
42.3149	46.5559
42.542	46.5463
43.0133	46.4846
43.3389	46.4197
43.2476	46.3119
43.185	46.3832
43.3343	46.3352
43.4049	46.2012
43.719	46.2238
43.4972	46.095
43.1781	45.9741
42.8718	45.8466
42.4555	45.7134
42.3234	45.6696
42.0387	45.5928
41.7881	45.5422
41.7001	45.5538
41.8282	45.5097
41.8678	45.567
41.7397	45.5476
41.6194	45.612
41.479	45.612
41.2544	45.4642
40.9062	45.6231
40.898	45.7018
40.7703	45.7674
40.9997	45.728
41.2983	45.628
41.3859	45.5179
41.3247	45.3858
41.3005	45.1682
41.7235	45.2556
41.9015	45.2478
42.399	45.1876
42.7733	45.1642
42.8568	45.1582
42.9399	45.1801
43.1032	45.1849
43.1049	45.0948
43.0257	45.1944
43.1613	45.2505
42.8713	45.351
42.4281	45.3273
42.2603	45.3613
42.6174	45.3224
42.8613	45.1961
43.7495	45.2653
44.5165	45.2559
45.8138	45.3421
49.4334	45.4273
52.6511	45.3909
55.064	45.5889
56.7255	45.7404
62.408	45.7458
69.1849	46.395
78.2707	47.0166
84.3782	48.0181
88.0173	50.8539
91.1975	52.559
93.0688	53.9664
92.9627	54.3334
92.2161	53.726
89.4988	53.0049
85.851	52.1219
82.0858	51.0906
78.0886	50.164
73.9383	49.2844
69.9425	48.5917
66.3171	47.9742
63.0543	47.567
60.3352	47.2411
57.7336	46.9695
55.176	46.7567
52.7761	46.4853
50.7359	46.2591
48.8477	46.0035
47.019	45.6561
46.2338	45.595
45.6331	45.5441
44.9983	45.4345
44.5364	45.4237
44.3262	45.3745
44.2584	45.4677
44.081	45.4111
43.7452	45.2297
43.5727	45.4142
43.1336	45.4606
42.7273	45.4992
42.4022	45.6388
85.9163	88.7747
122.178	124.721
152.396	154.69
177.592	179.597
198.588	200.353
216.084	217.649
230.665	232.05
242.815	244.063
252.941	254.075
261.379	262.418
268.41	269.37
274.216	275.164
279.041	279.992
283.048	284.015
286.401	287.368
289.181	290.162
291.499	292.49
293.43	294.43
295.039	296.047
296.38	297.395
297.497	298.518
298.442	298.836
299.215	294.534
299.86	286.799
300.398	276.794
300.859	265.287
301.23	252.783
301.539	239.596
301.796	226.096
302.011	212.24
302.19	198.652
302.339	185.931
302.463	173.867
302.567	162.793
302.653	152.463
302.725	142.834
302.785	133.668
302.835	124.928
302.89	117.175
302.936	110.244
302.96	104.146
302.981	98.5945
302.998	93.5247
303.013	88.8432
303.025	84.3107
303.034	80.2651
303.043	76.6116
303.05	73.4327
303.069	70.7165
303.071	68.1441
303.087	65.7587
303.087	63.4753
303.1	61.3711
303.11	59.631
303.12	58.0331
303.127	56.7553
303.133	55.6233
303.139	54.4651
303.143	53.6074
303.147	52.6911
303.15	51.9679
303.152	51.1906
303.154	50.8114
303.156	50.4552
303.158	50.1449
303.159	50.0072
301.347	49.6641
297.164	49.3379
291.569	49.1198
285.363	48.9112
277.759	48.7911
269.301	48.5701
260.547	48.3054
250.848	48.2996
241.167	48.1471
231.461	48.0738
222.15	47.8918
212.901	47.6192
203.849	47.3249
196.065	47.0394
186.851	46.8955
177.924	46.6949
169.384	46.4338
161.34	46.2431
154.046	46.111
147.363	46.0546
141.284	45.8734
135.17	45.8298
129.148	45.8606
123.244	45.8191
117.974	45.6637
112.952	45.4804
108.256	45.3277
104.114	45.1736
100.247	44.8302
96.4192	44.7993
92.5715	44.6661
89.016	44.5819
86.1201	44.4984
83.5458	44.4153
82.0452	44.373
79.9485	44.2571
77.8118	44.1068
75.6014	44.1561
73.2759	44.1838
71.2305	44.1935
69.2574	44.0672
67.7744	44.0023
66.4176	43.9079
65.1526	43.7084
63.9105	43.6898
62.5798	43.7818
61.2427	43.8853
60.1552	43.9582
58.7521	43.9248
58.026	43.8971
57.5015	43.8336
56.9167	43.5927
56.7786	43.6875
56.2068	43.7664
55.5154	43.8054
54.9796	43.8647
54.6808	43.8604
54.3244	43.8165
53.9064	43.7396
52.7792	43.5815
51.9338	43.7587
50.9876	43.8392
50.4139	43.8929
50.1642	43.8839
50.1039	43.9301
49.5164	43.888
48.9999	43.7187
48.5292	43.7253
48.1504	43.9054
47.6333	43.9883
47.1486	43.9634
46.7179	43.8755
46.4798	43.9096
46.0933	43.7635
45.5161	43.4672
45.1694	43.5425
44.7999	43.6322
44.3174	43.7204
43.9556	43.6998
44.1376	43.6424
44.1818	43.6617
44.2187	43.6241
44.0882	43.5256
44.2481	43.6584
44.3411	43.7153
44.4454	43.8165
44.2906	43.8739
44.2287	43.9487
44.3249	44.0109
44.0693	43.9285
44.098	43.9942
44.1623	44.2235
44.0949	44.334
43.9448	44.426
43.672	44.3282
43.6058	44.3003
43.6446	44.1831
43.5158	43.978
43.4756	43.9682
43.4287	44.0004
43.1478	43.96
43.1153	43.9264
42.8329	43.8984
42.7051	43.9959
42.4777	43.9563
42.3016	43.789
42.6518	43.8644
42.6348	43.8602
42.6206	43.8969
42.6759	43.9141
42.816	43.915
43.5505	43.9694
43.8538	43.9745
43.7841	43.8982
43.8738	44.0092
43.9083	44.0614
43.843	44.078
43.708	43.9844
43.7029	44.0004
43.4032	43.9869
42.952	43.8548
42.6969	43.9596
42.5649	44.0469
42.4549	44.1062
42.7392	44.1557
42.7076	44.0895
42.6947	44.088
42.5899	43.9793
42.2205	43.7947
42.0739	43.9229
41.8308	43.9895
41.7491	44.0181
41.7079	44.0957
41.8481	44.1335
42.0993	44.1112
42.2281	44.0658
42.3219	43.9474
42.4404	44.1039
42.378	44.1403
42.4066	44.1572
42.5647	44.1176
42.8308	44.192
42.8779	44.1869
42.9441	44.102
42.9857	44.0716
42.9533	44.0999
43.1009	44.1101
43.0896	44.1186
42.8921	44.0451
42.8753	44.0913
42.4986	44.0627
41.9833	43.8776
41.8628	43.9652
41.5877	43.9844
41.3988	44.0273
41.5368	43.9959
41.4773	43.9026
41.4142	43.8516
41.2811	43.7689
41.4925	43.606
41.9373	43.7791
42.1467	43.8831
42.6168	43.9563
42.8876	43.9233
43.0461	43.9226
43.1514	43.9087
43.172	43.7627
42.9205	43.6948
42.7915	43.786
42.4959	43.8619
42.4914	43.9252
42.3802	43.9108
42.5159	43.9257
42.1185	43.8844
41.6666	43.6216
41.5451	43.7115
41.3901	43.8267
40.9521	43.8959
40.6408	43.9804
40.7306	43.9837
40.9934	43.973
41.199	43.9238
41.3301	43.735
41.7885	43.8866
42.0093	44.0532
42.0053	44.1384
42.0289	44.1153
41.8873	44.0558
41.8902	43.9928
41.7718	43.8731
41.7805	43.8405
41.8684	43.9477
41.8073	44.0101
41.8907	44.0487
41.987	44.0138
42.3091	44.1189
42.4297	44.1662
42.4497	44.1251
42.3992	44.2251
42.3168	44.3219
42.5033	44.3489
42.7124	44.4116
42.9405	44.4504
43.4528	44.5097
43.7186	44.559
43.8595	44.4524
44.165	44.5919
44.1509	44.6007
44.2198	44.6349
44.3981	44.6768
44.4795	44.7655
44.5876	44.8662
44.5702	44.8293
44.5692	44.812
44.6758	44.9587
44.5229	44.9332
44.5969	44.912
44.7123	44.8137
44.8488	44.8527
44.8685	44.8718
44.9655	44.7399
45.1941	44.7643
45.398	44.7981
45.3933	44.7591
45.7521	44.6997
45.6884	44.5025
45.6487	44.4859
45.5754	44.3781
45.3934	44.221
45.2015	44.3991
44.8669	44.4803
44.5613	44.4943
44.4006	44.6268
44.1861	44.6566
44.37	44.7487
44.4963	44.7045
44.4405	44.5468
44.5148	44.59
44.4156	44.4916
44.2657	44.4097
44.114	44.2474
44.1487	44.2196
44.2582	44.1158
44.1883	43.9891
44.1301	43.9909
44.3367	44.0327
44.5089	44.081
45.1628	44.1615
45.6406	44.2017
46.173	44.383
46.5764	44.5206
46.5096	44.407
46.5346	44.5003
46.2868	44.4304
45.9862	44.2915
45.8029	44.2295
45.8785	44.2047
45.9415	44.278
45.9403	44.366
45.8183	44.3318
45.9048	44.478
46.1514	44.5729
46.1958	44.6923
46.2865	44.7919
46.5232	44.821
46.7071	44.7782
46.6991	44.6217
46.7059	44.5583
46.8056	44.6533
46.6201	44.6787
46.5057	44.6999
46.3702	44.6236
46.284	44.6942
46.4003	44.7128
46.6584	44.7015
46.8466	44.8666
47.0034	44.9371
47.2281	44.9286
47.5228	44.9888
47.7684	45.0657
47.9462	45.2239
47.9063	45.2751
47.8194	45.1969
47.7335	45.4406
47.353	45.4691
46.9285	45.3586
46.6284	45.2127
46.5396	45.239
46.5327	45.2205
46.4195	45.138
46.3386	44.9886
46.1368	45.0119
45.6464	44.7895
45.2511	44.6042
45.15	44.3557
45.3747	44.3502
45.3336	44.265
44.9233	44.0059
44.9306	44.0049
44.8695	43.9907
44.8589	43.9922
44.971	44.0472
44.8629	44.0259
45.1757	44.1694
45.3827	44.3157
45.394	44.384
45.6586	44.6155
45.3284	44.7144
44.9056	44.7699
44.4189	44.8431
44.1207	44.9174
44.0469	44.9794
43.9853	44.9371
44.0012	44.8883
44.3099	44.982
44.2583	44.9661
44.0003	44.9663
43.9466	44.953
43.9152	45.009
43.8219	44.9617
43.6904	44.8283
43.6345	44.744
43.5343	44.808
43.8671	44.8614
44.0235	45.0939
44.2077	45.2473
44.3476	45.5364
44.236	45.7639
44.022	45.8325
43.9244	46.1046
43.6683	46.2239
43.3744	46.3368
43.1698	46.5114
42.8515	46.7913
42.5325	47.1857
42.2802	47.474
42.2579	47.6606
42.2125	47.8698
42.2552	47.8695
42.1296	47.8693
41.8235	47.7885
41.7296	47.7212
41.8528	47.6517
41.8883	47.4863
41.9851	47.4156
42.1463	47.4104
42.4553	47.3524
42.8067	47.4921
42.9922	47.5145
43.3482	47.6003
43.8195	47.6181
44.1316	47.4986
44.3649	47.4124
44.4115	47.2735
44.3295	47.0771
44.1403	47.0075
43.9154	46.9897
43.6609	47.069
43.4354	47.0544
43.3414	47.0155
43.3437	46.9695
43.2248	46.8775
43.26	46.8009
43.5042	46.7236
43.9226	46.8337
44.231	46.8718
44.1925	46.8633
44.1604	46.9367
44.2948	46.998
44.1785	46.8609
44.2428	46.7333
44.2292	46.6001
44.3119	46.6906
44.2196	46.6988
44.1427	46.6385
44.307	46.7897
44.3767	46.7546
44.3005	46.7521
44.1564	46.8844
44.2781	47.0618
44.5406	47.3976
44.7191	47.5566
44.7739	47.6757
44.8867	47.8824
44.806	47.9069
44.6851	47.8333
44.759	47.7182
44.7802	47.6626
44.9054	47.6566
44.9694	47.6381
44.9153	47.4212
44.8164	47.1331
44.8953	46.7855
44.9072	46.6436
45.0112	46.4851
45.2725	46.5007
45.1544	46.5137
44.6397	46.4037
44.2779	46.3522
44.2584	46.2691
44.2288	46.0924
44.0832	45.9317
44.338	45.8246
44.6443	45.9235
44.8189	45.9387
44.763	45.7499
44.8776	45.8209
44.7985	45.7726
44.7326	45.7458
44.9463	45.6563
45.0437	45.6891
45.0712	45.7971
45.0942	45.8199
45.0327	45.7987
45.0755	45.8481
45.1514	45.8893
44.9461	45.8833
44.7078	45.744
44.7242	45.6817
44.8586	45.5357
45.1319	45.3066
45.2119	45.3306
45.1173	45.3372
44.864	45.3426
44.7737	45.3741
44.6313	45.2659
44.647	45.2698
44.4048	45.2328
44.109	45.0676
43.9968	45.1583
43.8899	45.1802
43.6665	45.1715
43.4938	45.1643
43.4841	45.2254
43.7984	45.2629
43.9798	45.1868
43.6339	44.9621
43.8158	45.0972
43.6853	45.0621
43.5498	45.0194
43.383	44.8495
43.271	44.8154
43.1641	44.7198
42.9677	44.5461
42.9248	44.5088
42.7011	44.5314
42.4206	44.5906
42.4287	44.5862
42.2876	44.5422
42.4253	44.707
42.446	44.8175
42.3289	44.7619
42.4597	44.8901
42.5418	44.9969
42.6505	45.0725
42.7546	45.0549
42.9084	45.0537
42.8217	45.1601
42.6286	45.0742
42.4139	44.9221
42.5708	44.9833
42.5673	44.9806
42.6315	44.9783
42.8058	44.9496
42.6959	44.9122
42.6044	44.8542
42.5281	44.7655
42.4376	44.7051
42.416	44.7622
42.4248	44.756
42.4053	44.8852
42.1338	44.9123
42.1762	45.0692
42.2384	45.267
42.0619	45.3648
42.479	45.5805
42.6116	45.6932
42.6012	45.7468
42.6732	45.8451
42.6257	45.8734
42.801	46.0312
42.7054	46.2031
42.357	46.2523
42.51	46.4007
42.4763	46.3766
42.287	46.3297
42.277	46.2772
42.4299	46.2738
42.4901	46.2709
42.4463	46.2416
42.3963	46.2306
42.3681	46.3289
42.17	46.2766
41.9243	46.2061
41.6793	46.0264
41.784	45.9707
41.925	45.9109
42.0157	45.7133
42.3061	45.7367
42.481	45.6621
42.6401	45.6268
42.8936	45.6109
42.9706	45.5036
42.9541	45.4545
42.9001	45.3195
42.5193	45.1533
42.5646	45.2566
42.3472	45.1546
42.2063	45.083
42.1561	44.8891
42.2619	44.8215
42.3501	44.792
42.3699	44.7675
42.7356	44.7739
43.1209	44.9135
43.5764	45.0165
43.7813	45.0754
43.7506	45.1245
43.7787	45.2863
43.5201	45.3942
43.1032	45.4305
42.9169	45.6084
42.6407	45.6358
42.8538	45.6452
42.7897	45.7337
42.6019	45.8074
42.1902	46.0031
42.3307	46.099
42.3269	46.179
44.1368	46.4068
50.3863	46.3817
56.0643	46.5757
62.5823	49.8937
74.2862	58.1788
92.8368	68.4543
110.901	85.7742
129.152	104.425
145.367	114.809
157.927	120.696
160.402	122.137
157.24	120.275
150.468	115.998
142.286	110.445
133.037	103.991
123.959	97.3502
114.407	90.8761
104.996	84.7826
96.5357	79.3958
89.2706	74.5307
82.9612	70.2078
77.7167	66.3771
73.118	63.1848
111.513	103.396
143.509	136.906
170.172	164.777
192.404	187.989
210.918	207.346
226.36	223.464
239.228	236.909
249.951	248.112
258.887	257.449
266.334	265.229
272.54	271.7
277.711	277.105
282.034	281.596
285.569	285.366
288.502	288.493
290.932	291.086
292.958	293.261
294.645	295.072
296.052	296.582
297.224	290.427
298.201	277.655
299.015	260.457
299.693	240.673
300.258	220.103
300.729	199.805
301.122	180.566
301.449	162.708
301.721	146.281
301.948	131.92
302.138	119.281
302.296	108.319
302.427	98.7545
302.537	90.5152
302.628	83.394
302.704	77.2044
302.767	72.1404
302.82	67.9741
302.878	64.4754
302.912	61.4389
302.941	58.9085
302.978	56.6924
302.996	54.7113
303.011	52.8992
303.023	51.7115
303.033	50.762
303.042	49.9036
303.049	49.1077
303.068	48.3907
303.084	47.7664
303.084	47.1655
303.098	46.9871
303.109	46.8251
303.105	46.6497
303.115	46.4633
303.123	46.2273
303.13	46.0441
303.136	45.6766
303.141	45.3972
303.145	45.2852
303.148	45.1784
303.151	45.1163
303.153	44.984
303.155	44.9409
303.157	44.8781
303.158	44.678
303.159	44.8202
303.16	44.8715
303.161	44.9143
303.162	44.95
303.162	44.9394
303.163	44.9037
301.027	44.8202
296.777	44.8044
290.669	44.8718
282.974	44.9817
274.909	45.0867
266.282	44.9996
257.561	44.9942
248.332	44.8688
239.003	44.6837
230.289	44.7846
220.919	44.721
211.767	44.6814
202.649	44.5947
194.662	44.6165
186.824	44.5943
179.446	44.4415
171.619	44.5157
164.143	44.5909
156.355	44.573
149.582	44.5715
142.703	44.6106
136.017	44.7371
129.451	44.7755
123.174	44.7805
116.855	44.9594
110.877	45.0412
105.426	45.096
100.695	45.0208
96.6317	45.0521
92.9769	45.0648
89.7164	45.0216
86.1532	45.1066
82.66	45.1236
79.4267	45.1915
77.068	45.1675
74.9144	45.0938
73.1198	45.0727
71.4228	45.0014
69.6594	44.8613
68.0019	45.0133
66.5535	45.1399
65.1718	45.2185
66.2097	45.2035
65.7181	45.2446
64.8921	45.2521
63.7471	45.1509
62.4303	45.0665
61.3866	45.0768
60.1274	45.0048
59.3467	44.985
58.1723	44.794
57.3549	44.7557
56.3244	44.7372
55.4791	44.6681
54.8822	44.7313
54.2235	44.784
53.4464	44.7339
53.1613	44.7728
53.2596	44.832
53.234	44.962
52.9844	45.0031
52.4138	44.9299
51.8039	45.0973
51.2554	45.183
50.5431	45.1873
50.3122	45.1775
50.5495	45.1827
50.6264	45.2408
50.2876	45.2489
49.8709	45.175
49.3357	45.2881
48.903	45.3152
48.4485	45.2975
48.1369	45.2692
48.0652	45.38
48.0324	45.4187
48.0184	45.3031
47.9397	45.3008
48.0083	45.3123
47.6895	45.3219
47.3835	45.2628
47.0345	45.1195
47.3077	45.0672
47.4951	45.0371
47.4633	44.8239
47.4905	44.8881
47.4191	44.9281
47.588	45.042
47.7958	45.043
48.2108	44.9766
48.4895	44.9884
48.6142	44.9311
48.369	44.8834
48.0572	45.0585
47.6362	45.097
47.4734	45.0888
47.3646	45.0282
47.4619	44.9777
47.7042	45.0431
47.8793	45.0707
48.1863	45.134
48.281	45.2673
48.0914	45.3113
48.4034	45.3077
48.3947	45.1703
48.2667	45.1767
47.9182	45.1149
47.8293	44.9962
47.8492	45.1525
47.5434	45.2291
47.0066	45.2526
46.5592	45.2184
46.4013	45.1631
46.1354	45.2244
45.7258	45.2084
45.1964	45.1413
44.7552	45.3003
44.307	45.3522
44.2558	45.476
43.9849	45.5389
43.7859	45.6182
43.5127	45.5634
43.3522	45.4506
43.3392	45.3297
43.6374	45.3767
43.6038	45.2816
43.643	45.256
43.6353	45.2078
43.6155	45.302
43.3976	45.3133
43.1085	45.2691
43.1496	45.3396
43.0227	45.3447
42.6484	45.2817
42.4841	45.2964
42.3876	45.2818
42.5086	45.3771
42.4751	45.3759
42.3397	45.3346
43.4223	45.5688
43.7738	45.6566
43.7443	45.676
43.7735	45.6115
44.1739	45.6116
44.427	45.6653
44.7184	45.6832
44.6659	45.6848
44.5415	45.9009
44.1154	46.0273
43.9082	46.0789
43.6951	45.9742
43.9474	45.8869
44.1039	45.7605
43.8583	45.4536
43.6401	45.3725
43.4315	45.3184
43.1367	45.327
42.9583	45.2938
42.4603	45.0782
42.314	44.9522
42.0846	44.7935
41.9606	44.6075
42.0051	44.7212
41.9615	44.7487
41.7909	44.7851
41.6755	44.8423
41.5257	44.8899
41.9918	44.8222
42.2459	44.6986
42.498	44.6359
42.8289	44.8388
42.9569	44.8333
43.077	44.8288
43.4726	44.7846
43.9232	44.8419
44.3389	44.8762
44.5645	44.757
44.5913	44.8055
44.5867	44.9398
44.5158	44.9712
44.5507	44.9974
44.3918	44.9386
44.4474	44.9702
44.5071	44.9965
44.3823	44.9513
44.5066	45.0345
44.261	45.0501
43.6131	45.0363
43.1538	45.0919
42.7173	45.1382
42.5684	45.2575
42.3638	45.2762
41.9112	45.0904
41.7221	45.2176
41.7123	45.2698
41.8115	45.3671
41.451	45.3004
41.0834	45.2583
40.992	45.1694
41.2112	45.0954
41.2731	45.0606
41.365	45.0987
41.4549	45.1439
41.6239	45.1547
42.0602	45.0966
42.3029	45.169
42.3709	45.1891
42.629	45.0581
42.8575	45.1235
42.8867	45.178
42.6559	45.2771
42.1681	45.306
41.7347	45.2227
41.6959	45.1935
41.6635	45.1423
41.7709	44.9116
41.8604	45.0015
41.7066	44.9689
41.6053	45.0223
41.212	45.0131
41.0723	45.0457
40.9558	44.9654
40.8185	44.7777
41.0264	44.6883
41.3608	44.7482
41.4381	44.8518
41.5561	44.9516
41.4262	44.8736
41.3717	44.8892
41.1919	44.8753
40.8003	44.81
41.1321	44.9033
41.3818	44.9945
41.6436	45.0168
42.0632	44.9548
42.4263	44.7957
43.0512	44.6765
43.0616	44.5503
42.9225	44.3914
43.2633	44.5948
43.4263	44.7643
43.4414	44.8787
43.2524	44.9337
43.1218	44.9661
43.1876	44.9931
43.2021	45.0156
43.2814	45.0344
43.4146	45.1038
43.5927	45.0944
43.6338	45.1269
43.3859	45.0868
43.3808	45.1206
43.6183	45.1487
43.7222	45.0244
43.6073	45.0417
43.4042	45.0293
43.4094	44.9652
43.2795	44.952
43.0236	44.8605
43.1191	44.9186
43.5211	44.9267
43.6547	44.8125
43.8197	44.986
43.6886	45.0097
43.5927	45.0294
43.5129	45.0459
43.3657	44.9925
43.4849	45.0554
43.5439	45.0675
43.2438	45.0776
43.2221	45.2204
43.1369	45.2722
43.415	45.3825
43.5394	45.3401
43.8176	45.3182
44.2375	45.3806
44.2382	45.3385
44.2657	45.4243
44.3557	45.4959
44.6188	45.4614
45.026	45.5134
45.2445	45.4626
45.8027	45.4337
46.2006	45.3022
46.1293	45.0449
46.1102	45.0588
46.1615	45.0435
46.1504	45.0442
46.1009	45.0313
45.9657	44.9803
45.8395	45.0184
45.4926	45.0233
45.2707	44.8796
45.1127	45.0016
44.8332	44.9958
44.6272	44.9776
44.2137	44.9893
44.0707	45.0796
44.3812	45.1683
44.4654	45.1616
44.8177	45.2501
45.1112	45.4043
45.114	45.5195
45.1567	45.6692
45.1519	45.7536
45.2017	45.9046
45.27	45.9363
45.2867	45.7479
45.314	45.8327
44.9473	45.8361
44.5476	45.8256
44.5369	45.8034
44.4206	45.7983
44.4176	45.8209
44.2406	45.7323
43.8244	45.6048
43.8537	45.7537
43.4617	45.6897
43.1216	45.7036
43.1606	45.6883
43.5691	45.8233
43.8424	45.976
43.8015	46.0228
44.3584	46.0348
44.4867	46.0181
44.3787	45.9235
44.2081	45.9118
44.1332	45.8618
44.111	45.9813
43.8373	46.054
43.6092	45.9803
43.9967	46.1203
44.0644	46.1699
43.8253	46.1977
43.8007	46.3418
43.4713	46.4753
43.3042	46.7477
42.9904	46.8405
43.1184	46.8237
43.1982	47.0918
43.1572	47.2212
43.0962	47.2619
43.0051	47.4569
42.9694	47.7672
43.0203	48.1198
43.009	48.2928
43.0936	48.4772
43.0029	48.51
42.8602	48.4164
42.8621	48.3788
43.3204	48.334
43.8634	48.5652
44.1011	48.758
44.0708	48.8111
44.247	48.8286
44.2327	48.8028
44.1671	48.6873
44.4481	48.6582
44.4943	48.5937
44.6134	48.6608
44.5112	48.6093
44.023	48.4186
43.6566	48.4209
43.4318	48.2616
43.325	48.0751
43.2898	47.7586
43.2738	47.5351
43.5829	47.3891
43.9076	47.0123
43.9499	46.7117
44.0657	46.5015
44.001	46.3532
44.0143	46.2162
44.0119	45.9409
44.0233	45.8323
43.9523	45.7284
43.8931	45.588
43.8169	45.6054
44.519	45.6736
45.9233	45.8513
49.9141	46.1338
57.2691	46.3959
63.3579	46.6682
70.5541	47.7949
75.839	48.989
83.48	49.9707
114.883	52.0916
138.755	54.7723
163.699	56.0661
184.539	56.8756
197.689	56.5965
208.512	56.2029
224.355	56.2106
237.53	56.217
248.469	55.8328
253.502	54.8143
252.189	53.8984
247.496	53.0948
241.611	52.0491
230.098	51.0836
215.642	50.2388
199.459	49.4542
182.306	48.7466
165.38	48.2376
150.535	48.0148
139.616	47.8561
129.898	47.6297
124.259	47.468
117.853	47.2661
113.267	47.0575
108.747	46.5479
104.792	46.4322
100.167	46.3357
95.5602	46.2016
130.228	89.2706
159.118	125.135
183.18	154.967
203.231	179.815
219.954	200.534
233.889	217.787
245.502	232.178
255.18	244.17
263.245	254.164
269.979	262.492
275.523	269.432
280.13	275.215
283.969	280.035
287.168	284.064
289.835	287.409
292.043	290.209
293.883	292.53
295.417	285.868
296.708	272.526
297.784	254.813
298.667	234.693
299.417	213.575
300.042	193.197
300.562	174.133
300.996	156.97
301.344	141.433
301.647	127.746
301.887	115.736
302.1	105.284
302.264	96.7085
302.414	89.6161
302.526	83.934
302.619	78.8901
302.71	74.6196
302.786	70.8595
302.849	67.7528
302.902	65.1237
302.945	63.4834
302.982	62.0494
302.999	60.8678
303.027	59.4667
303.05	58.0306
303.069	56.6323
303.085	55.3462
303.098	54.5565
303.109	53.9119
303.119	53.3612
303.126	52.7949
303.133	52.0812
303.138	51.3522
303.143	50.5298
303.146	49.7907
303.149	49.3628
303.152	49.0465
303.154	48.7427
303.156	48.3552
303.157	47.9651
303.159	47.5326
303.16	46.9707
302.811	46.9725
299.835	46.8666
295.326	46.8186
289.152	46.7249
281.696	46.526
272.931	46.2796
263.854	45.8996
253.832	45.7845
243.734	45.6751
232.714	45.5705
222.187	45.3759
212.273	45.1197
203.152	44.8525
194.436	44.4687
186.474	44.0279
177.745	44.2382
169.18	44.3194
161.076	44.4004
153.692	44.4546
147.041	44.3788
140.626	44.2888
134.501	44.0526
128.658	44.0304
122.849	44.0388
118.8	44.0995
114.043	44.1232
109.568	44.1564
105.315	44.1841
101.221	44.1668
97.4054	44.0853
92.8427	44.2188
88.4629	44.2764
85.122	44.2706
81.8813	44.2658
78.9255	44.3692
76.3683	44.4017
74.1836	44.3213
72.2019	44.3886
70.6444	44.4716
68.5272	44.5139
67.045	44.5223
65.5143	44.4755
64.4805	44.544
63.2563	44.5071
62.0079	44.3957
61.2764	44.4775
60.0624	44.5322
58.7956	44.5778
57.8877	44.6427
57.534	44.643
56.9438	44.8045
56.1027	44.9122
55.1735	44.9347
54.9767	45.0341
54.3695	45.0901
53.944	45.1367
53.3612	45.1085
52.5263	45.9176
51.535	46.5919
50.7358	47.4762
49.9758	48.8174
49.4902	49.3845
48.8707	49.763
48.5827	49.8501
48.007	49.7213
47.7152	49.7079
46.9886	49.4819
46.5979	49.1592
46.3395	48.9171
45.963	48.5005
46.2268	48.0997
46.0572	47.8596
45.7009	47.6461
45.686	47.522
45.2976	47.2976
44.9201	46.9763
44.8742	46.8295
44.7419	46.6265
44.4571	46.4708
44.569	46.2739
44.6219	46.1367
44.8271	46.0492
45.0788	45.936
45.181	45.8416
45.1185	45.7765
45.1873	45.6281
45.1506	45.5717
45.0125	45.4843
44.8303	45.5324
44.6651	45.4919
44.5408	45.4179
44.6253	45.5845
44.4942	45.6427
44.1969	45.5704
44.2581	45.5907
44.3494	45.5136
44.4121	45.4897
44.3837	45.416
44.266	45.2203
44.4903	45.299
44.8921	45.1631
44.8912	45.0498
45.0515	44.9823
45.2121	45.02
45.3458	45.1187
45.3364	45.1471
44.9256	45.238
44.8385	45.4077
44.5376	45.4149
44.1257	45.4342
43.9435	45.3967
44.141	45.3788
44.2921	45.2564
44.6329	45.1007
44.702	45.1456
44.5582	45.1024
44.8949	45.0261
45.1353	44.882
44.8789	44.8021
44.7458	44.8833
44.7156	44.8167
44.5694	44.6
44.6223	44.7149
44.5186	44.7435
44.9291	44.7405
45.1369	44.6842
45.0951	44.6105
45.235	44.549
45.3112	44.4172
44.8912	44.3477
44.9173	44.4778
44.6838	44.5593
44.4087	44.5601
44.1257	44.4936
44.051	44.4919
43.8947	44.4368
43.8317	44.3774
44.2761	44.4757
44.3913	44.5039
44.2186	44.5408
43.7255	44.5312
43.6101	44.4964
43.5408	44.5211
43.5502	44.5283
43.4102	44.3462
43.8174	44.3557
44.0225	44.3367
44.0724	44.3209
43.9529	44.2405
43.8399	44.2139
43.8263	44.2185
43.6672	44.1418
43.7227	44.051
43.7555	44.1768
43.8365	44.2279
44.1055	44.2437
44.3565	44.2031
44.6463	44.2229
44.8072	44.2126
44.5384	44.1101
44.6233	44.1454
44.2508	44.1212
43.8598	44.0607
44.192	44.1043
44.3884	44.1406
44.7131	44.2247
44.8226	44.2409
44.9138	44.0933
45.4196	44.2658
45.6934	44.3558
45.9484	44.404
46.349	44.4038
46.4276	44.3499
46.6139	44.3453
46.5678	44.2609
46.3547	44.1368
46.7278	44.2349
46.7701	44.2361
46.4696	44.2639
46.1117	44.193
45.921	44.1743
45.7082	44.199
45.4504	44.0986
45.0475	44.1628
45.0475	44.2565
44.7386	44.3212
44.7095	44.3886
44.9539	44.3507
45.3322	44.3997
45.6474	44.3868
45.816	44.1746
46.2252	44.1858
46.1498	44.1817
45.9796	44.138
46.2003	44.0747
46.0082	44.0354
46.063	44.0429
46.2698	43.9552
46.684	43.8015
46.6933	43.942
46.2175	44.0188
45.7539	44.056
45.5288	44.0735
45.8515	44.1553
46.0667	44.1697
46.555	44.0877
46.9216	44.1671
47.0122	44.2601
46.8459	44.3511
46.9223	44.4134
46.8247	44.3848
46.8106	44.361
46.5839	44.2605
46.2607	44.0291
46.26	44.0645
45.9236	44.0672
45.5762	44.056
45.6224	44.0198
45.9027	44.0837
46.1362	44.1503
46.304	44.085
46.6184	44.0439
46.4506	44.2649
45.9347	44.2879
45.6929	44.3071
45.5316	44.3096
45.4912	44.3923
45.7128	44.4478
45.6153	44.3329
45.4401	44.358
45.5359	44.5132
45.3068	44.6426
44.995	44.6698
44.8023	44.679
44.87	44.727
45.0339	44.6193
45.0899	44.4355
45.0695	44.4301
44.9718	44.4255
44.689	44.4889
44.6413	44.5552
44.7493	44.6507
44.9199	44.784
45.2098	44.7742
45.1425	44.7123
45.0864	44.8622
44.6501	44.9334
44.5821	44.9659
44.5925	44.9661
44.7221	45.0065
44.9644	45.0134
44.938	44.9116
44.8219	44.894
44.4969	44.8256
44.2395	44.782
44.0518	44.7591
43.7746	44.7132
43.5972	44.7958
43.4495	44.8646
43.3532	44.8414
43.1521	45.0504
43.1725	45.023
43.1896	45.0271
43.244	45.138
43.1014	45.1498
43.0363	45.2805
43.0895	45.376
43.0935	45.3616
43.2714	45.5241
43.2317	45.5656
43.024	45.6136
43.0389	45.7073
42.8364	45.8525
42.8558	46.0273
42.5764	46.0252
42.5585	46.0906
42.839	46.1988
42.8042	46.0607
42.8557	46.0799
43.0465	46.069
43.4203	46.1271
43.8661	46.1486
44.0093	46.0457
44.2898	46.0674
44.6982	46.0318
44.5281	45.9752
44.3595	46.0221
43.8966	45.9537
43.6049	46.0981
43.0395	46.1648
42.34	46.1666
42.0929	46.2488
41.9272	46.156
41.9906	46.0653
41.9629	46.0166
41.7517	46.0163
41.7101	46.11
41.7157	46.1075
41.7606	46.1189
41.9324	46.1821
42.2501	46.1274
42.5149	46.1086
42.5207	45.9989
42.3643	46.0821
42.14	46.0709
41.3486	45.9809
40.9309	46.1477
40.8112	46.233
41.1143	46.304
41.461	46.3364
41.3335	46.3231
41.0526	46.4194
40.9126	46.3788
40.8093	46.1704
40.8442	46.0773
40.9	45.8788
40.9869	45.794
40.8847	45.8308
40.6921	45.8748
40.5853	46.019
40.3351	46.1257
40.2878	46.1744
40.4633	46.2955
40.5692	46.2487
40.9664	46.1694
40.8407	46.0496
40.736	46.1109
40.6891	46.162
40.4082	46.1106
40.2815	46.2155
40.1357	46.2895
40.1754	46.2974
40.2756	46.2637
40.3322	46.1953
40.2585	46.2324
40.2643	46.1827
40.0945	46.0069
40.2887	46.0754
40.6789	46.0249
40.843	45.8889
40.617	45.7756
40.3884	45.6005
40.2651	45.6024
40.0683	45.5502
40.0117	45.4665
40.475	45.4907
40.5521	45.4571
40.7641	45.4829
40.9273	45.5178
41.4126	45.6678
41.7095	45.739
41.7689	45.7178
41.9527	45.7941
42.2268	45.8309
42.2	45.7675
42.1642	45.755
42.0538	45.6908
41.9887	45.7179
41.7732	45.7271
41.3385	45.5735
41.406	45.6874
41.4354	45.715
41.5002	45.6441
41.4199	45.6253
41.4738	45.5961
41.7068	45.6928
41.9413	45.6793
41.8412	45.5068
41.7981	45.5512
42.0039	45.5075
41.9739	45.4712
41.8147	45.4274
41.8162	45.5925
41.9384	45.7971
42.1343	45.8603
42.5393	45.9531
42.5678	45.9903
42.5379	45.9675
42.5533	46.0156
42.7944	46.0423
42.9819	46.1989
42.6546	46.3428
42.3013	46.3284
42.9605	46.5447
43.0532	46.4832
42.8618	46.4589
42.5948	46.5057
41.9291	46.3836
41.2401	46.2415
40.639	46.0828
40.353	45.9103
40.5042	45.9277
40.657	45.875
40.7307	45.8311
40.9264	45.5662
41.1835	45.4664
41.2097	45.3294
41.2584	45.1347
41.3661	45.1068
41.5499	45.1909
41.7836	45.1536
42.0187	45.1762
42.4027	45.1548
42.6823	45.3518
42.6467	45.516
43.8527	45.4245
45.677	45.5497
48.0703	45.6004
51.0452	45.6694
53.2824	45.6329
54.6096	45.6563
54.762	45.8637
55.3053	46.0098
55.3552	46.118
57.1562	46.3157
62.9683	51.3693
81.6592	56.1716
103.333	67.5203
123.771	78.5087
148.513	86.3226
173.536	93.5325
182.851	99.0573
182.77	99.9544
175.679	98.3112
164.584	94.8198
152.828	90.7552
140.17	86.1995
128.399	81.5704
117.663	77.095
107.643	72.882
98.1771	68.9548
89.6445	65.4403
83.0713	62.4579
77.5667	59.9725
72.9393	57.6865
69.3383	55.8084
65.6525	54.2164
62.2452	53.1449
59.4595	52.1849
57.4068	51.3177
55.629	50.7562
54.1474	50.1942
52.698	49.5379
52.3631	49.0582
51.7751	48.7121
51.3926	48.6386
51.0066	48.4967
50.3492	48.1099
49.8686	47.9622
49.468	47.745
49.0805	47.4432
49.1067	47.2588
49.9479	47.1321
51.025	47.0533
51.8957	46.9473
52.2049	46.859
52.0999	46.8392
51.717	46.7421
51.7336	46.6611
52.1236	46.634
52.0187	46.7188
52.0254	46.7626
51.8563	46.826
51.5811	46.9862
51.0832	46.9318
50.5742	46.8595
50.3784	46.9201
50.0271	46.8767
50.2583	47.0016
50.3031	47.1326
50.1794	47.1343
92.4108	90.021
127.604	125.693
156.931	155.419
181.37	180.191
201.737	200.835
218.708	218.051
232.865	232.398
244.662	244.353
254.44	254.316
262.574	262.619
269.353	269.551
274.988	275.328
279.684	280.142
283.598	280.648
286.859	271.292
289.563	258.285
291.83	245.041
293.719	233.305
295.293	224.104
296.605	216.986
297.685	211.606
298.598	207.525
299.359	204.393
299.98	201.931
300.511	200.026
300.953	198.883
301.322	197.809
301.629	196.404
301.885	194.212
302.098	191.338
302.276	188.083
302.424	184.404
302.548	180.988
302.651	177.337
302.736	173.568
302.808	169.098
302.867	164.124
302.917	158.985
302.958	153.52
303.006	148.255
303.046	142.953
303.066	137.877
303.082	132.546
303.096	127.15
303.107	121.552
301.949	116.255
298.149	111.412
291.396	106.946
284.963	102.794
275.922	98.4481
265.796	94.5444
256.162	90.2974
246.2	86.2612
236.515	82.562
226.039	79.439
215.295	76.7694
205.549	74.0343
196.246	71.3119
186.814	68.6805
177.155	66.2326
168.178	63.8434
159.691	62.1344
151.597	60.6835
143.335	59.4072
135.697	58.2093
128.795	56.929
122.385	55.6203
116.225	54.3283
110.392	53.2247
105.143	52.4931
99.8142	51.8432
96.0186	51.1269
92.1034	50.3958
89.1899	49.6924
86.3591	49.0929
83.6106	48.3247
81.159	48.0203
78.0953	47.7531
74.9512	47.4903
73.325	47.1906
71.3923	46.9275
69.2983	46.6947
67.0294	46.4471
64.9238	46.093
63.0213	46.1068
60.9256	46.078
59.6089	45.9868
58.6729	45.8303
57.8794	45.6596
57.5405	45.5173
57.3522	45.4121
57.3966	45.3648
57.0039	45.5268
56.4752	45.635
56.7733	45.7251
56.9142	45.7465
56.8974	45.9121
56.1312	45.9963
56.0703	45.8785
55.3211	45.9684
54.0521	46.0432
54.3914	46.1056
54.0429	46.1845
53.1212	46.1965
52.7561	46.193
52.0891	46.1902
51.0364	46.0535
51.8381	46.1947
51.7808	46.2856
51.3302	46.3748
50.8472	46.3416
50.3238	46.2334
49.619	46.1298
49.2601	45.8688
49.5385	45.7454
50.1734	45.8843
50.8502	45.9597
50.7696	46.0092
50.2054	45.9161
49.6278	45.9056
49.3077	45.8969
48.92	45.7554
49.2551	45.7717
49.9372	45.7316
49.9282	45.7251
50.7265	45.7062
51.3514	45.7039
53.6854	45.7557
55.1872	45.772
55.4179	45.6781
55.2072	45.8282
55.0854	45.8324
54.3929	45.7822
53.6815	45.6866
52.444	45.6473
51.2515	45.5876
50.3384	45.3902
49.6715	45.2928
48.7397	45.3594
48.4467	45.4149
47.9742	45.4208
47.4461	45.3586
46.9121	45.3605
46.4402	45.3218
46.1946	45.1955
45.7617	45.2514
45.4547	45.3115
45.1585	45.3884
45.731	45.4256
47.0542	45.4432
47.8614	45.5653
48.3326	45.5327
48.5238	45.3982
48.2534	45.5815
47.6251	45.6268
46.9537	45.6377
47.6702	45.6603
47.7435	45.6656
48.7716	45.6566
49.2791	45.4745
49.6618	45.3497
49.8061	45.4336
49.6174	45.4633
50.5346	45.4478
50.8558	45.3139
51.2443	45.2695
50.9368	45.1654
50.0627	44.998
50.6371	45.1272
50.6994	45.2482
50.5365	45.376
50.2529	45.4287
49.7749	45.392
49.3362	45.3884
49.4945	45.3047
49.3711	45.1544
49.4027	45.2709
48.838	45.3009
48.166	45.2989
47.9686	45.3242
48.2071	45.305
48.3655	45.3158
47.6379	45.2442
47.0853	45.2115
46.7054	45.2379
46.9126	45.2196
46.9644	45.1909
46.927	45.2208
47.1107	45.38
47.3041	45.5395
47.3847	45.5515
47.022	45.6287
46.7333	45.6259
46.318	45.6235
46.0391	45.7559
46.438	45.8527
47.2404	46.0812
47.1167	46.1775
46.4361	46.0832
46.0838	46.139
45.6291	46.172
45.1561	46.1726
44.8291	46.1597
44.8118	46.2027
44.4079	46.1982
44.0041	46.0602
43.6945	45.9586
44.0006	46.0485
44.3363	45.9354
44.9384	45.868
45.3729	45.8253
45.5873	45.924
45.6451	45.9929
45.1829	46.0368
44.6903	46.0465
44.3335	46.0815
44.063	46.0569
43.5824	46.1036
42.8461	46.1022
43.804	46.1413
44.3471	46.1337
46.183	46.0735
47.901	46.2383
48.5402	46.2279
48.9923	46.1924
48.6572	46.1896
48.1496	46.1604
48.1296	46.1764
48.0994	46.0823
48.2892	45.9905
48.313	46.1154
48.3866	46.1389
48.4882	46.0913
49.8892	46.0517
50.4656	46.0589
50.2879	46.0113
49.7637	45.8641
49.3538	45.9832
49.1062	46.0825
48.47	46.098
47.7519	46.0707
47.1131	45.9942
46.3794	46.0648
46.4529	45.9893
46.5679	45.7652
46.61	45.8873
46.4033	45.8817
46.1908	45.8501
46.242	45.8238
46.0698	45.8422
46.2487	45.8306
46.5857	45.821
46.8129	45.7727
46.8545	45.9205
46.4459	45.9496
46.1322	45.9873
45.9112	46.0322
45.8075	46.177
45.56	46.2708
45.018	46.2013
44.8886	46.2239
44.7539	46.2293
44.4537	46.2204
44.0154	46.3338
43.6502	46.415
43.6816	46.4423
[truncated: 1,101 more rows]
